# Supplementary material
Source: PubMed Central journal article supplement (PMC3435205)
Supplement: 1212381109_pnas.201212381SI.pdf [file 1212381109_pnas.201212381SI.pdf]

# Supporting Information

Belanger et al. 10.1073/pnas.1212381109

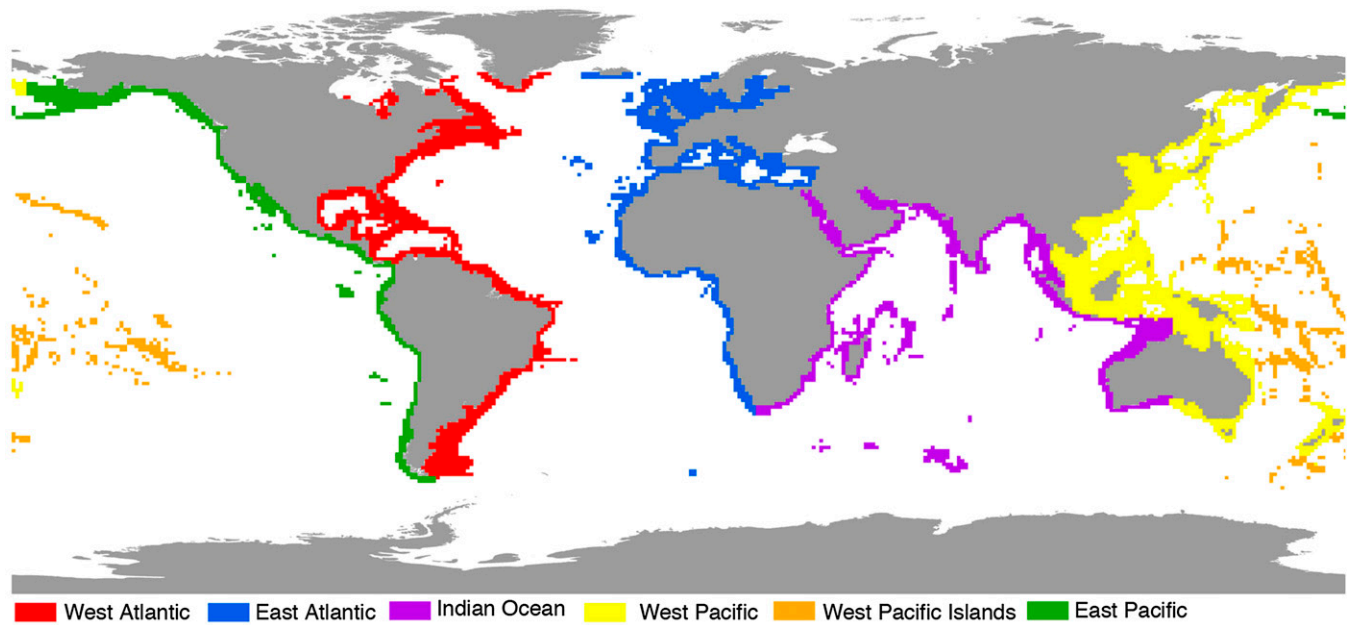

Fig. S1. Map of coastline assignments used for analysis.

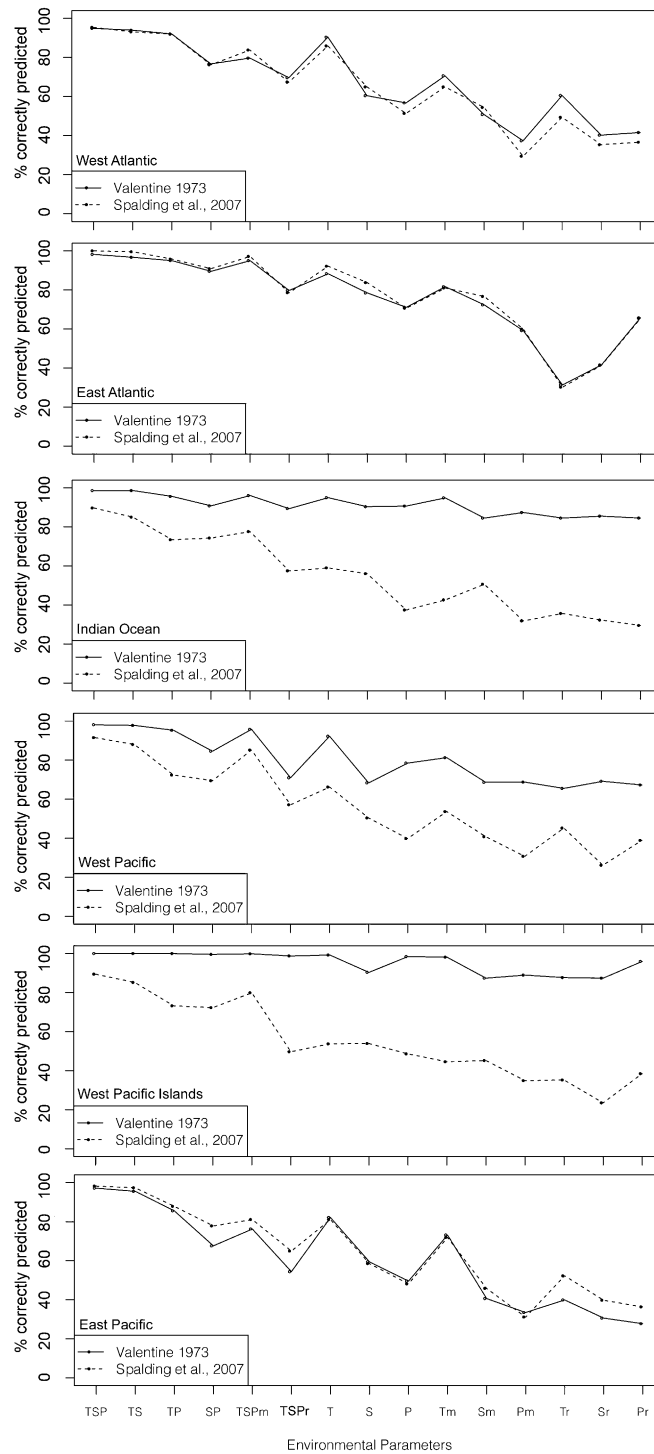

**Fig. S2.** Proportion of grid cells correctly predicted with nested multinomial logistic regressions where nested sets of oceanographic variables are used to predict biogeographic units membership at the coastline-scale for two biogeographic schemes. T, temperature; S, salinity; P, net primary productivity; m, mean annual values only; r, seasonal ranges only. Both mean annual values and seasonal ranges are used as predictors unless otherwise specified.

**Table S1. Results from multinomial logistic regressions at the basin scale for combinations of temperature, salinity, and productivity**

| Region         | Oceanographic variables | Spalding et al. (6) |            | Valentine (1) |           |
|----------------|-------------------------|---------------------|------------|---------------|-----------|
|                |                         | AIC                 | % correct  | AIC           | % correct |
| Atlantic Basin | TSP                     | 1574.2541           | 86.11      | 1554.5174     | 86.78     |
|                | TS                      | 1919.0188           | 81.79      | 2019.5277     | 81.63     |
|                | TP                      | 2310.6245           | 79.45      | 2077.5940     | 81.63     |
|                | SP                      | 4028.2070           | 64.72      | 4119.2604     | 65.87     |
|                | Mean                    | 2889.1195           | 74.19      | 2872.6364     | 72.32     |
|                | Range                   | 5018.7010           | 55.20      | 5084.2548     | 56.56     |
|                | T                       | 3253.0357           | 64.98      | 2995.8055     | 69.77     |
|                | S                       | 5462.3780           | 44.80      | 5998.9693     | 47.92     |
|                | P                       | 6853.6874           | 37.36      | 6642.2616     | 39.85     |
|                | Tm                      | 4450.0939           | 58.06      | 4085.2605     | 61.19     |
|                | Sm                      | 6520.2745           | 38.76      | 7195.8872     | 36.06     |
|                | Pm                      | 8553.6308           | 20.71      | 8453.4566     | 20.92     |
|                | Tr                      | 7274.3786           | 29.66      | 7183.0434     | 33.61     |
|                | Sr                      | 8494.1120           | 18.31      | 8668.4117     | 22.89     |
| Pacific Basin  | Pr                      | 7897.0784           | 31.48      | 7886.0499     | 35.12     |
|                | TSP                     | 4950.5760           | 80.20      | 2874.1524     | 89.00     |
|                | TS                      | 6827.1300           | 70.98      | 3233.8184     | 87.95     |
|                | TP                      | 9671.5030           | 58.65      | 3453.5118     | 86.75     |
|                | SP                      | 10274.8327          | 56.98      | 6522.6356     | 74.31     |
|                | Mean                    | 8423.5462           | 63.40      | 4312.6558     | 82.70     |
|                | Range                   | 14514.1439          | 38.74      | 8245.1403     | 65.90     |
|                | T                       | 13370.2547          | 42.43      | 4096.7124     | 82.92     |
|                | S                       | 15326.5947          | 35.46      | 8133.6998     | 67.95     |
|                | P                       | 18190.9774          | 24.52      | 8470.1694     | 70.17     |
|                | Tm                      | 16832.9861          | 26.74      | 5643.4275     | 75.76     |
|                | Sm                      | 17668.5572          | 27.55      | 9607.9787     | 63.34     |
|                | Pm                      | 21137.3089          | 18.11      | 10377.8202    | 65.40     |
|                | Tr                      | 19529.4645          | 25.27      | 9779.9474     | 63.82     |
| Sr             | 22653.6593              | 12.36               | 9891.5673  | 65.40         |           |
| Pr             | 20505.8611              | 18.94               | 10009.5586 | 63.98         |           |

Unmodified abbreviations signify combined annual mean and seasonal range; m and r signify annual mean or seasonal range alone, respectively. TSP, temperature, salinity, and productivity; AIC, Akaike information criterion.

**Table S2. Results from multinomial logistic regressions at the coastline scale for combinations of temperature, salinity, and productivity**

| Oceanographic variables               | East Pacific |           | West Pacific Islands |           | West Pacific |           | Indian Ocean |           | East Atlantic |           | West Atlantic |           |
|---------------------------------------|--------------|-----------|----------------------|-----------|--------------|-----------|--------------|-----------|---------------|-----------|---------------|-----------|
|                                       | % correct    | AIC       | % correct            | AIC       | % correct    | AIC       | % correct    | AIC       | % correct     | AIC       | % correct     | AIC       |
| <b>Spalding biogeographic scheme</b>  |              |           |                      |           |              |           |              |           |               |           |               |           |
| TSP                                   | 98.21        | 129.4221  | 89.41                | 543.0267  | 91.48        | 943.3720  | 89.66        | 802.3963  | 100.00        | 98.0001   | 95.40         | 369.4630  |
| TS                                    | 97.32        | 136.0872  | 85.20                | 640.4002  | 87.99        | 1167.9600 | 84.93        | 1072.2375 | 99.54         | 96.5202   | 93.10         | 462.6210  |
| TP                                    | 87.84        | 381.9150  | 73.21                | 1086.9563 | 72.37        | 2278.2423 | 73.38        | 1504.0063 | 95.79         | 278.4827  | 91.95         | 545.7276  |
| SP                                    | 77.82        | 677.8696  | 72.27                | 1028.6839 | 69.48        | 2744.6094 | 74.26        | 1614.6819 | 90.89         | 624.7677  | 76.25         | 1648.8195 |
| Mean                                  | 81.04        | 545.1232  | 79.91                | 746.0326  | 85.18        | 1304.6531 | 77.56        | 1287.4154 | 97.15         | 229.9975  | 83.81         | 1052.5928 |
| Range                                 | 64.94        | 1118.6570 | 49.69                | 1725.3948 | 57.14        | 3606.1079 | 57.43        | 2328.2095 | 78.59         | 1241.1131 | 67.34         | 1888.1514 |
| T                                     | 81.04        | 514.3560  | 53.74                | 1545.6950 | 66.20        | 2857.3405 | 58.97        | 2208.7251 | 92.14         | 379.2801  | 85.92         | 721.0794  |
| S                                     | 58.50        | 1056.3590 | 53.89                | 1594.5792 | 50.37        | 4016.4624 | 56.00        | 2264.3980 | 83.71         | 927.0010  | 64.94         | 2288.6199 |
| P                                     | 48.12        | 1369.7961 | 48.60                | 1800.8348 | 39.84        | 5434.0121 | 37.40        | 3502.4659 | 70.62         | 1649.2970 | 51.34         | 2725.8336 |
| Tm                                    | 71.91        | 747.9727  | 44.55                | 1717.8045 | 53.66        | 3731.3913 | 42.57        | 3067.9530 | 80.98         | 815.0344  | 64.94         | 1576.4913 |
| Sm                                    | 45.80        | 1542.1934 | 45.17                | 1858.2543 | 40.78        | 4727.7421 | 50.61        | 2726.5602 | 76.65         | 1246.1797 | 54.41         | 2915.8247 |
| Pm                                    | 31.13        | 1836.2629 | 34.89                | 2283.5388 | 30.72        | 6598.5547 | 31.79        | 4017.9138 | 59.91         | 2238.9964 | 29.41         | 3742.7940 |
| Tr                                    | 52.24        | 1464.1014 | 35.20                | 2312.7968 | 45.20        | 4758.8200 | 35.64        | 3567.7446 | 30.18         | 2223.1635 | 49.33         | 2571.8793 |
| Sr                                    | 39.71        | 1804.2198 | 23.52                | 2760.9495 | 26.16        | 6546.0420 | 32.23        | 3869.2800 | 41.34         | 2447.5293 | 35.34         | 3505.6058 |
| Pr                                    | 36.31        | 1788.3689 | 38.47                | 2222.9836 | 38.90        | 5986.0386 | 29.48        | 4064.4912 | 65.38         | 1987.9158 | 36.59         | 3399.5545 |
| <b>Valentine biogeographic scheme</b> |              |           |                      |           |              |           |              |           |               |           |               |           |
| TSP                                   | 99.46        | 123.6955  | 100.00               | 56.0002   | 98.57        | 124.2388  | 98.12        | 206.1705  | 98.18         | 150.0794  | 94.92         | 418.0608  |
| TS                                    | 97.67        | 156.0741  | 100.00               | 41.6876   | 98.57        | 122.2391  | 97.79        | 216.9852  | 96.70         | 193.7719  | 93.97         | 475.8171  |
| TP                                    | 88.37        | 358.0478  | 100.00               | 42.4404   | 95.60        | 204.2373  | 95.31        | 427.4692  | 94.99         | 258.6252  | 92.05         | 533.4627  |
| SP                                    | 71.56        | 820.9125  | 99.53                | 66.5420   | 90.76        | 479.0003  | 84.57        | 1307.2501 | 89.52         | 556.6310  | 76.72         | 1649.7534 |
| Mean                                  | 82.11        | 507.9120  | 99.84                | 38.8196   | 96.04        | 219.8138  | 95.77        | 326.9835  | 94.99         | 276.5889  | 79.69         | 1101.2957 |
| Range                                 | 55.81        | 1545.4198 | 98.75                | 84.4317   | 89.33        | 567.0904  | 70.96        | 2387.8227 | 79.73         | 1195.0348 | 69.64         | 1935.9592 |
| T                                     | 85.15        | 412.0605  | 99.22                | 53.4258   | 94.94        | 241.0578  | 92.22        | 647.7484  | 88.27         | 486.5286  | 90.42         | 630.8623  |
| S                                     | 60.47        | 1152.8282 | 90.34                | 427.3278  | 90.32        | 556.4764  | 68.34        | 2232.0852 | 78.47         | 992.0194  | 60.44         | 2687.8897 |
| P                                     | 51.70        | 1506.1099 | 98.44                | 96.7516   | 90.65        | 654.2027  | 78.47        | 2353.1800 | 71.07         | 1606.9679 | 56.70         | 2514.8156 |
| Tm                                    | 76.74        | 613.0932  | 98.13                | 84.3949   | 94.83        | 236.5041  | 81.29        | 1398.9948 | 81.66         | 868.9825  | 70.59         | 1341.4671 |
| Sm                                    | 41.32        | 1704.7456 | 87.38                | 559.5594  | 84.49        | 1075.5462 | 68.61        | 2378.7077 | 72.32         | 1322.2342 | 50.77         | 3395.5260 |
| Pm                                    | 33.81        | 1951.9892 | 88.94                | 448.6964  | 87.35        | 841.4309  | 68.75        | 3307.4376 | 59.11         | 2175.1007 | 37.36         | 3654.5939 |
| Tr                                    | 43.29        | 1869.0942 | 87.69                | 523.6450  | 84.49        | 1050.2493 | 65.53        | 2865.7792 | 31.32         | 2210.9549 | 60.54         | 2455.8221 |
| Sr                                    | 31.84        | 1915.1965 | 87.38                | 565.5770  | 85.48        | 761.2677  | 69.15        | 2986.9512 | 41.57         | 2462.5062 | 40.23         | 3676.5885 |
| Pr                                    | 30.23        | 2005.7643 | 95.95                | 149.7016  | 84.49        | 1053.8006 | 67.27        | 3130.0102 | 65.72         | 1964.9854 | 41.57         | 3358.8725 |

Unmodified abbreviations signify combined annual mean and seasonal range; m and r signify annual mean or seasonal range alone, respectively. AIC, Akaike information criterion; TSP, temperature, salinity, and productivity.

**Table S3. Percentage improvement in biogeographic units prediction accuracy by temperature, salinity, and productivity over the expectation by chance**

| Region               | % correct by chance |           | % correct using TSP |           | Improvement over chance |           |
|----------------------|---------------------|-----------|---------------------|-----------|-------------------------|-----------|
|                      | Spalding            | Valentine | Spalding            | Valentine | Spalding                | Valentine |
|                      | Atlantic Basin      | 10.49     | 11.80               | 86.11     | 86.78                   | 75.62     |
| East Atlantic        | 27.16               | 27.08     | 95.40               | 94.92     | 68.24                   | 67.84     |
| West Atlantic        | 16.29               | 20.96     | 100.00              | 98.18     | 83.71                   | 77.22     |
| Pacific Basin        | 4.05                | 44.04     | 80.20               | 89.00     | 76.15                   | 44.96     |
| Indian Ocean         | 9.46                | 72.22     | 89.66               | 98.57     | 80.20                   | 26.35     |
| West Pacific         | 12.25               | 49.72     | 91.48               | 98.12     | 79.23                   | 48.40     |
| West Pacific Islands | 12.50               | 77.10     | 89.41               | 100.00    | 76.91                   | 22.90     |
| East Pacific         | 19.85               | 17.12     | 98.21               | 97.14     | 78.36                   | 80.02     |

**Table S4. Goodness-of-fit of the multinomial logistic regressions and the effect of temperature, salinity, and productivity on predicting biogeographic unit (BU) membership**

| Region               | Likelihood-ratio statistic |           | McFadden's $R^2$ |           | Maximum likelihood $R^2$ |           | Maximum likelihood Craig and Uhler $R^2$ |           |
|----------------------|----------------------------|-----------|------------------|-----------|--------------------------|-----------|------------------------------------------|-----------|
|                      | Spalding                   | Valentine | Spalding         | Valentine | Spalding                 | Valentine | Spalding                                 | Valentine |
| East Atlantic        | 3780.44                    | 3544.67   | 0.93             | 0.92      | 0.97                     | 0.97      | 0.99                                     | 0.99      |
| West Atlantic        | 2651.00                    | 2562.21   | 1.00             | 0.97      | 0.95                     | 0.95      | 1.00                                     | 1.00      |
| Indian Ocean         | 4100.06                    | 1005.55   | 0.88             | 0.92      | 0.99                     | 0.67      | 0.99                                     | 0.96      |
| West Pacific         | 6473.60                    | 3170.69   | 0.90             | 0.96      | 0.99                     | 0.88      | 1.00                                     | 0.99      |
| West Pacific Islands | 2457.21                    | 650.19    | 0.88             | 0.99      | 0.98                     | 0.64      | 0.99                                     | 0.99      |
| East Pacific         | 1976.99                    | 2031.10   | 0.98             | 0.96      | 0.97                     | 0.97      | 1.00                                     | 1.00      |

All likelihood-ratio statistics are significant ( $P < 0.001$ ;  $\chi^2$  test, df = 6).

**Table S5. Variance inflation factors (VIF) for the z-score-transformed oceanographic variables (temperature, salinity, and productivity) used as predictors in multinomial logistic regressions**

| Variable | Mean annual temperature | Seasonal range temperature | Mean annual salinity | Seasonal range salinity | Mean annual productivity | Seasonal range productivity |
|----------|-------------------------|----------------------------|----------------------|-------------------------|--------------------------|-----------------------------|
| VIF      | 1.62                    | 1.64                       | 2.21                 | 1.29                    | 3.13                     | 4.76                        |

**Table S6.  $\chi^2$  tests comparing the proportion of misclassified grid cells with respect to proximity to biogeographic unit (BU) boundaries and sea floor depth for the two biogeographic schemes**

|                                       | Classified correctly | Misclassified | % correct | $\chi^2$ statistic | $P$ value    |
|---------------------------------------|----------------------|---------------|-----------|--------------------|--------------|
| <b>Spalding biogeographic scheme</b>  |                      |               |           |                    |              |
| Proximity to BU boundary              |                      |               |           |                    |              |
| Within 1°                             | 542                  | 132           | 80.42     |                    |              |
| Outside 1°                            | 4,624                | 225           | 95.36     | 216.1219           | $P < 0.001$  |
| Within 2°                             | 1,148                | 200           | 85.16     |                    |              |
| Outside 2°                            | 4,018                | 157           | 96.24     | 204.943            | $P < 0.001$  |
| Within 3°                             | 1,732                | 251           | 87.34     |                    |              |
| Outside 3°                            | 3,434                | 106           | 97.01     | 194.7066           | $P < 0.001$  |
| Depth of sea floor                    |                      |               |           |                    |              |
| Shallower than or equal to 20 m       | 1,932                | 100           | 95.08     |                    |              |
| Deeper than 20 m                      | 3,234                | 257           | 92.64     | 12.4347            | $P < 0.001$  |
| Shallower than or equal to 50 m       | 2,479                | 126           | 95.16     |                    |              |
| Deeper than 50 m                      | 2,687                | 231           | 92.08     | 21.0817            | $P < 0.001$  |
| Shallower than or equal to 100 m      | 2,886                | 150           | 95.06     |                    |              |
| Deeper than 100 m                     | 2,280                | 207           | 91.68     | 25.3152            | $P < 0.001$  |
| <b>Valentine biogeographic scheme</b> |                      |               |           |                    |              |
| Proximity to BU boundary              |                      |               |           |                    |              |
| Within 1°                             | 245                  | 53            | 82.21     |                    |              |
| Outside 1°                            | 5,146                | 79            | 98.49     | 313.0876           | $P < 0.001$  |
| Within 2°                             | 565                  | 83            | 87.19     |                    |              |
| Outside 2°                            | 4,826                | 49            | 98.99     | 336.5482           | $P < 0.001$  |
| Within 3°                             | 888                  | 103           | 89.61     |                    |              |
| Outside 3°                            | 4,503                | 29            | 99.36     | 327.4437           | $P < 0.001$  |
| Depth of sea floor                    |                      |               |           |                    |              |
| Shallower than or equal to 20 m       | 1,979                | 53            | 97.39     |                    |              |
| Deeper than 20 m                      | 3,412                | 79            | 97.74     | 0.5168             | $P = 0.4722$ |
| Shallower than or equal to 50 m       | 2,543                | 62            | 97.62     |                    |              |
| Deeper than 50 m                      | 2,848                | 70            | 97.60     | 0.0018             | $P = 0.9662$ |
| Shallower than or equal to 100 m      | 2,967                | 69            | 97.73     |                    |              |
| Deeper than 100 m                     | 2,424                | 63            | 97.47     | 0.2937             | $P = 0.5879$ |

Three distance thresholds (1°, 2°, or 3°) are tested for the effect of grid-cell proximity to BU boundaries. Significant values indicate proportionally more misclassification in grid cells near BU boundaries. Three depth thresholds (20, 50, and 100 m) were tested for the effect of sea floor depth. Significant values indicate proportionally more misclassification in grid cells near BU boundaries. In the Valentine scheme, there is no significant difference in misclassification with depth.

**Table S7. Results from multinomial logistic regressions at the coastline level for combinations of environmental variables**

| Region                         | West Atlantic |           | East Atlantic |           | Indian Ocean |           | West Pacific |           | West Pacific Islands |           | East Pacific |           |
|--------------------------------|---------------|-----------|---------------|-----------|--------------|-----------|--------------|-----------|----------------------|-----------|--------------|-----------|
|                                | AIC           | % correct | AIC           | % correct | AIC          | % correct | AIC          | % correct | AIC                  | % correct | AIC          | % correct |
| Spalding biogeographic scheme  |               |           |               |           |              |           |              |           |                      |           |              |           |
| TSONP                          | 210.0002      | 100.00    | 210.0002      | 100.00    | 480.0002     | 100.00    | 540.0034     | 100.00    | 360.0001             | 100.00    | 210.0001     | 100.00    |
| TSON                           | 182.0001      | 100.00    | 182.0002      | 100.00    | 416.0001     | 100.00    | 531.0357     | 98.80     | 312.0001             | 100.00    | 182.0001     | 100.00    |
| TSO                            | 188.2927      | 97.54     | 98.0002       | 100.00    | 549.6126     | 89.58     | 700.7716     | 89.08     | 492.8153             | 89.34     | 121.0844     | 97.79     |
| TSN                            | 154.0137      | 100.00    | 154.0001      | 100.00    | 425.1023     | 97.44     | 608.5806     | 96.40     | 356.7030             | 97.63     | 154.0002     | 100.00    |
| TSP                            | 173.5382      | 97.54     | 98.0001       | 100.00    | 429.0200     | 94.15     | 634.8296     | 92.47     | 502.8801             | 89.17     | 113.3298     | 98.74     |
| TON                            | 172.9079      | 99.57     | 154.0002      | 100.00    | 519.6652     | 94.15     | 922.8670     | 88.32     | 465.2104             | 96.45     | 154.0001     | 100.00    |
| TOP                            | 255.4465      | 96.09     | 99.6271       | 100.00    | 547.7375     | 89.76     | 1234.5580    | 74.56     | 929.7474             | 75.30     | 159.3552     | 96.21     |
| TNP                            | 173.1042      | 99.13     | 154.0001      | 100.00    | 382.8483     | 98.90     | 901.0330     | 89.08     | 285.3134             | 99.32     | 154.0001     | 100.00    |
| TS                             | 208.5642      | 95.95     | 70.0004       | 100.00    | 632.3840     | 86.84     | 791.8093     | 86.24     | 584.6978             | 84.77     | 111.1418     | 96.85     |
| TO                             | 352.0529      | 92.04     | 179.8994      | 95.95     | 919.5690     | 74.59     | 1586.8344    | 67.69     | 1274.0108            | 62.44     | 213.7364     | 91.48     |
| TN                             | 171.0120      | 98.70     | 126.0001      | 100.00    | 609.4069     | 88.85     | 1126.6378    | 84.17     | 529.6888             | 92.22     | 126.0002     | 100.00    |
| TP                             | 295.2918      | 93.92     | 154.4425      | 96.96     | 748.2859     | 78.43     | 1424.8349    | 71.62     | 1018.6807            | 72.59     | 162.3835     | 94.64     |
| T                              | 407.9318      | 89.44     | 208.2372      | 93.72     | 1225.0221    | 60.15     | 1849.5477    | 64.96     | 1450.2972            | 52.79     | 284.6784     | 82.65     |
| S                              | 1317.5382     | 70.04     | 530.1380      | 84.82     | 1290.8198    | 60.88     | 2482.2654    | 49.13     | 1406.7393            | 54.31     | 576.7219     | 61.20     |
| N                              | 841.2034      | 80.61     | 565.2425      | 84.82     | 1465.7977    | 64.17     | 1904.9076    | 67.90     | 1075.4100            | 73.94     | 223.7113     | 92.43     |
| O                              | 809.8129      | 79.74     | 256.3962      | 92.71     | 1598.1539    | 53.56     | 2099.6529    | 55.79     | 1607.7885            | 43.15     | 391.4764     | 73.82     |
| P                              | 1621.5088     | 62.52     | 953.9071      | 68.62     | 1880.2138    | 42.60     | 3388.4342    | 36.79     | 1634.2959            | 49.41     | 749.2408     | 50.47     |
| Valentine biogeographic scheme |               |           |               |           |              |           |              |           |                      |           |              |           |
| TSONP                          | 240.0002      | 100.00    | 150.0002      | 100.00    | 90.0002      | 100.00    | 180.0001     | 100.00    | 90.0002              | 100.00    | 210.0001     | 100.00    |
| TSON                           | 208.0002      | 100.00    | 130.0001      | 100.00    | 78.0002      | 100.00    | 156.0001     | 100.00    | 78.0001              | 100.00    | 182.0001     | 100.00    |
| TSO                            | 187.1492      | 97.83     | 129.1102      | 98.18     | 42.0002      | 100.00    | 85.7955      | 100.00    | 42.0002              | 100.00    | 104.4690     | 99.00     |
| TSN                            | 176.0001      | 100.00    | 110.0001      | 100.00    | 66.0001      | 100.00    | 132.0001     | 100.00    | 66.0002              | 100.00    | 154.0002     | 100.00    |
| TSP                            | 237.5460      | 96.67     | 102.3551      | 98.99     | 57.3841      | 99.63     | 125.9436     | 99.02     | 42.0002              | 100.00    | 98.0002      | 100.00    |
| TON                            | 176.0001      | 100.00    | 110.0001      | 100.00    | 86.3306      | 99.27     | 132.0002     | 100.00    | 66.0002              | 100.00    | 154.0002     | 100.00    |
| TOP                            | 184.5819      | 97.83     | 124.3652      | 97.77     | 82.1000      | 97.99     | 125.4996     | 99.34     | 42.0002              | 100.00    | 123.4235     | 98.00     |
| TNP                            | 176.0002      | 100.00    | 110.0002      | 100.00    | 66.0014      | 100.00    | 132.0002     | 100.00    | 66.0002              | 100.00    | 154.0001     | 100.00    |
| TS                             | 240.4446      | 95.66     | 122.8495      | 97.17     | 50.0358      | 99.27     | 132.7752     | 98.14     | 30.7640              | 100.00    | 105.0760     | 98.00     |
| TO                             | 241.0551      | 95.66     | 226.3560      | 92.51     | 86.0032      | 97.26     | 181.7345     | 97.93     | 30.0008              | 100.00    | 145.3042     | 93.00     |
| TN                             | 144.0001      | 100.00    | 135.6083      | 98.58     | 79.7823      | 98.72     | 125.3002     | 99.34     | 54.0001              | 100.00    | 126.0001     | 100.00    |
| TP                             | 239.1273      | 95.37     | 129.4160      | 96.36     | 86.7303      | 97.44     | 192.1835     | 97.16     | 31.5758              | 100.00    | 148.2403     | 96.00     |
| T                              | 373.0334      | 91.61     | 253.6596      | 89.68     | 122.8313     | 96.34     | 308.8324     | 93.89     | 47.4162              | 99.15     | 207.7020     | 87.00     |
| S                              | 1588.5481     | 64.40     | 558.5582      | 81.17     | 297.8086     | 91.22     | 1195.0286    | 76.53     | 351.1043             | 91.03     | 599.7627     | 64.00     |
| O                              | 680.0072      | 80.75     | 297.3890      | 89.88     | 121.2182     | 96.16     | 461.0094     | 90.72     | 55.3802              | 98.31     | 303.8774     | 82.00     |
| N                              | 672.2541      | 88.28     | 596.1660      | 80.57     | 235.7785     | 93.24     | 631.5262     | 90.17     | 253.0103             | 95.26     | 297.8504     | 89.00     |
| P                              | 1574.1922     | 63.10     | 915.3737      | 69.84     | 347.3264     | 91.41     | 1252.5992    | 82.31     | 44.6224              | 98.98     | 797.9237     | 60.00     |

Environmental variables include: temperature (T), salinity (S), dissolved oxygen concentration (O), nutrient concentrations (N, including phosphate, nitrate, and silicate), and net primary productivity (P). Both means and seasonal ranges are used for each variable. Percentage correct is the percent of grid cells classified into the correct biogeographic unit. AIC, Akaike information criterion.

**Table S8. Mantel correlations between bivalve composition and mean annual values and seasonal ranges in temperature, salinity, and net primary productivity**

| Region                     | Pearson         |                | Spearman        |                |
|----------------------------|-----------------|----------------|-----------------|----------------|
|                            | Mantel <i>r</i> | <i>P</i> value | Mantel <i>r</i> | <i>P</i> value |
| Jaccard dissimilarity      |                 |                |                 |                |
| Northwestern Atlantic      | 0.4001          | 0.001          | 0.5041          | 0.001          |
| Southwestern Atlantic      | 0.4577          | 0.001          | 0.6502          | 0.001          |
| Northeastern Atlantic      | 0.3852          | 0.001          | 0.4793          | 0.001          |
| Southeastern Atlantic      | 0.4981          | 0.001          | 0.4982          | 0.001          |
| Indian Ocean               | 0.2559          | 0.001          | 0.2864          | 0.001          |
| Northwestern Pacific       | 0.432           | 0.001          | 0.564           | 0.001          |
| Southwestern Pacific       | 0.4319          | 0.001          | 0.522           | 0.001          |
| North West Pacific Islands | 0.5622          | 0.001          | 0.5767          | 0.001          |
| South West Pacific Islands | 0.6765          | 0.001          | 0.7399          | 0.001          |
| Northeastern Pacific       | 0.5523          | 0.001          | 0.6365          | 0.001          |
| Southeastern Pacific       | 0.5491          | 0.001          | 0.5538          | 0.001          |
| Simpson dissimilarity      |                 |                |                 |                |
| Northwestern Atlantic      | 0.3962          | 0.001          | 0.5347          | 0.001          |
| Southwestern Atlantic      | 0.434           | 0.001          | 0.6645          | 0.001          |
| Northeastern Atlantic      | 0.383           | 0.001          | 0.4898          | 0.001          |
| Southeastern Atlantic      | 0.3141          | 0.001          | 0.354           | 0.001          |
| Indian Ocean               | 0.3136          | 0.001          | 0.3484          | 0.001          |
| Northwestern Pacific       | 0.3754          | 0.001          | 0.5632          | 0.001          |
| Southwestern Pacific       | 0.4446          | 0.001          | 0.543           | 0.001          |
| North West Pacific Islands | 0.7651          | 0.001          | 0.703           | 0.001          |
| South West Pacific Islands | 0.6982          | 0.001          | 0.766           | 0.001          |
| Northeastern Pacific       | 0.5165          | 0.001          | 0.6205          | 0.001          |
| Southeastern Pacific       | 0.5348          | 0.001          | 0.5353          | 0.001          |

*P* values were estimated after 1,000 iterations.

**Dataset S1. The 1° grid-cell identifiers and environmental data**

[Dataset S1](#)

**Dataset S2. Jaccard-distance matrix of bivalve assemblage data at the 1° grid-cell resolution for the Atlantic Basin**

[Dataset S2](#)

**Dataset S3. Simpson-distance matrix of bivalve assemblage data at the 1° grid-cell resolution for the Atlantic Basin**

[Dataset S3](#)

**Dataset S4. Jaccard-distance matrix of bivalve assemblage data at the 1° grid-cell resolution for the Pacific Basin**

[Dataset S4](#)

**Dataset S5. Simpson-distance matrix bivalve assemblage data at the 1° grid-cell resolution for the Pacific Basin**

[Dataset S5](#)
